# Supplementary material for: Field Testing Two Flux Footprint Models
Source: Copernicus journal article supplement (doi:10.5194/amt-2021-106), 2021-06-21
Supplement: Supplementary file 1 [file amt-2021-106-supplement.pdf]

Table with columns: Location, Meteorological Measurements, Synthetic Source Information, EC Measured Flux, Synthetic Flux estimated from LS footprint, Synthetic Flux estimated from KM footprint, and Distance category. Rows represent various dates and times, showing detailed flux measurements and model estimates.

Summary table for LS model, KM model, and Nobs. Columns: Dist, LS model, KM model, Nobs. Rows: 15, 30, 50.

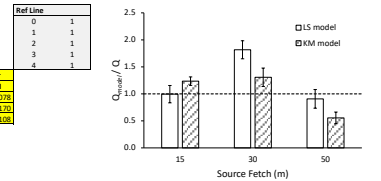

Summary table for OLS and OMM models. Columns: OLS, OMM. Rows: Average (all obs), Count, STD Dev, STD Err.
